# Supplementary material for: CASCADE: a novel quasi all paths-based network analysis algorithm for clustering biological interactions
Source: PubMed Central journal article supplement (PMC2253513; doi:10.1186/1471-2105-9-64), 2008-01-29
Supplement: 1471-2105-9-64-S1.pdf [file 1471-2105-9-64-S1.pdf]

| Cluster | Size | Density | Distribution |      |      | -Log $p$ | Function                                                 |
|---------|------|---------|--------------|------|------|----------|----------------------------------------------------------|
|         |      |         | H            | D    | U    |          |                                                          |
| 1       | 411  | 0.0103  | 17.5         | 76.4 | 6.1  | 19.3     | Vesicular transport                                      |
| 2       | 303  | 0.0104  | 33.3         | 60.0 | 6.6  | 19.9     | Mitotic cell cycle & cell cycle control                  |
| 3       | 240  | 0.0171  | 23.3         | 70.8 | 5.8  | 44.1     | Nuclear transport                                        |
| 4       | 176  | 0.0274  | 46.0         | 43.1 | 10.8 | 30.8     | Transported compounds                                    |
| 5       | 170  | 0.0181  | 32.4         | 60.0 | 7.6  | 19.0     | Cytoskeleton                                             |
| 6       | 104  | 0.0220  | 14.8         | 76.5 | 8.7  | 16.3     | Conversion to kinetic energy                             |
| 7       | 96   | 0.0450  | 76.0         | 19.8 | 4.2  | 39.7     | mRNA synthesis                                           |
| 8       | 79   | 0.0431  | 58.2         | 39.2 | 2.5  | 33.3     | General transcription activities                         |
| 9       | 78   | 0.0416  | 35.9         | 62.8 | 1.3  | 19.9     | Ribosome biogenesis                                      |
| 10      | 73   | 0.0353  | 39.7         | 58.9 | 1.5  | 9.7      | Phosphate metabolism                                     |
| 11      | 70   | 0.0356  | 22.9         | 65.7 | 11.4 | 8.1      | Ribosome biogenesis                                      |
| 12      | 69   | 0.0682  | 66.7         | 24.6 | 8.7  | 43.9     | mRNA processing (splicing, 5'-, 3'-end processing)       |
| 13      | 60   | 0.0616  | 23.3         | 65.0 | 11.7 | 13.7     | Homeostasis of protons                                   |
| 14      | 50   | 0.0637  | 68.0         | 30.0 | 2.0  | 34.0     | rRNA processing                                          |
| 15      | 37   | 0.0781  | 10.8         | 89.2 | 0.0  | 7.2      | Cell-cell adhesion                                       |
| 16      | 29   | 0.1330  | 48.3         | 51.7 | 0.0  | 26.8     | Peroxisomal transport                                    |
| 17      | 28   | 0.1164  | 28.6         | 67.9 | 3.6  | 6.9      | Cytokinesis (cell division) /septum formation            |
| 18      | 23   | 0.1581  | 65.2         | 30.4 | 4.3  | 13.6     | DNA conformation modification (e.g. chromatin)           |
| 19      | 18   | 0.1764  | 72.2         | 22.2 | 5.6  | 18.2     | Mitochondrial transport                                  |
| 20      | 17   | 0.2206  | 70.6         | 29.4 | 0.0  | 22.5     | Microtubule cytoskeleton                                 |
| 21      | 17   | 0.2206  | 82.4         | 11.8 | 5.9  | 19.1     | rRNA synthesis                                           |
| 22      | 16   | 0.3000  | 93.8         | 6.2  | 0.0  | 19.5     | Splicing                                                 |
| 23      | 15   | 0.2190  | 26.7         | 73.3 | 0.0  | 30.4     | Regulation of nitrogen utilization                       |
| 24      | 15   | 0.3047  | 86.7         | 13.3 | 0.0  | 8.1      | Energy generation (e.g. ATP synthase)                    |
| 25      | 14   | 0.3407  | 85.7         | 14.3 | 0.0  | 14.3     | DNA conformation modification (e.g. chromatin)           |
| 26      | 14   | 0.1978  | 57.1         | 28.6 | 14.3 | 13.3     | chromosome condensation                                  |
| 27      | 13   | 0.5641  | 76.9         | 23.1 | 0.0  | 17.0     | Mitosis                                                  |
| 28      | 13   | 0.4103  | 69.2         | 23.1 | 7.7  | 15.4     | 3'-end processing                                        |
| 29      | 12   | 0.3636  | 58.3         | 41.7 | 0.0  | 14.3     | Posttranslational modification of amino acids            |
| 30      | 12   | 0.1667  | 16.7         | 75.0 | 8.3  | 2.3      | Autoproteolytic processing                               |
| 31      | 11   | 0.2181  | 54.5         | 45.4 | 0.0  | 2.9      | Transcriptional control                                  |
| 32      | 10   | 0.4667  | 80.0         | 20.0 | 0.0  | 14.3     | Translation initiation                                   |
| 33      | 9    | 0.2500  | 22.2         | 77.8 | 0.0  | 4.1      | S-adenosyl-methionine - homocysteine cycle               |
| 34      | 8    | 0.3214  | 50.0         | 37.5 | 12.5 | 5.5      | Metabolism of energy reserves (e.g. glycogen, trehalose) |
| 35      | 8    | 0.2857  | 62.5         | 25.0 | 12.5 | 5.2      | Vacuolar transport                                       |
| 36      | 7    | 0.3333  | 42.9         | 57.1 | 0.0  | 7.1      | DNA damage response                                      |
| 37      | 7    | 0.3333  | 71.4         | 28.6 | 0.0  | 4.3      | Modification by ubiquitination, deubiquitination         |
| 38      | 7    | 0.2857  | 28.6         | 71.4 | 0.0  | 3.4      | Biosynthesis of serine                                   |
| 39      | 6    | 0.5333  | 100.0        | 0.0  | 0.0  | 12.1     | Modification with sugar residues (e.g. glycosylation)    |
| 40      | 6    | 0.4000  | 100.0        | 0.0  | 0.0  | 10.0     | ER to Golgi transport                                    |
| 41      | 6    | 0.3333  | 16.7         | 16.7 | 66.6 | 7.0      | Regulation of nitrogen utilization                       |
| 42      | 6    | 0.4667  | 100.0        | 0.0  | 0.0  | 3.9      | DNA recombination and DNA repair                         |
| 43      | 6    | 0.4000  | 66.6         | 33.3 | 0.0  | 1.9      | Intracellular signalling                                 |
| 44      | 5    | 0.5000  | 100.0        | 0.0  | 0.0  | 6.8      | Transported compounds (substrates)                       |
| 45      | 5    | 0.4000  | 100.0        | 0.0  | 0.0  | 6.8      | Meiosis                                                  |
| 46      | 5    | 0.6000  | 100.0        | 0.0  | 0.0  | 6.0      | Vacuolar transport                                       |
| 47      | 5    | 0.9000  | 100.0        | 0.0  | 0.0  | 4.5      | Vesicular transport (Golgi network, etc.)                |
| 48      | 5    | 0.4000  | 20.0         | 40.0 | 40.0 | 4.0      | cAMP mediated signal transduction                        |
| 49      | 5    | 0.5000  | 40.0         | 40.0 | 20.0 | 3.1      | Oxidative stress response                                |
| 50      | 5    | 0.4000  | 40.0         | 60.0 | 0.0  | 1.8      | Deoxyribonucleotide metabolism                           |

**Table 1.** Clusters obtained using CASCADE for the yeast PPI network. The first column is a cluster identifier; the Size column indicates the number of proteins in each cluster; the Density indicates the percentage of possible protein interactions that are present; the  $H$  column indicates the percentage of proteins concordant with the major function indicated in the last column; the  $D$  column indicates the percentage of proteins discordant with the major function and  $U$  column indicates the percentage of proteins not assigned to any function. The  $-\log p$  values for biological function are shown.
