# Supplementary material for: CASCADE: a novel quasi all paths-based network analysis algorithm for clustering biological interactions
Source: PubMed Central journal article supplement (PMC2253513; doi:10.1186/1471-2105-9-64), 2008-01-29
Supplement: 1471-2105-9-64-S2.pdf [file 1471-2105-9-64-S2.pdf]

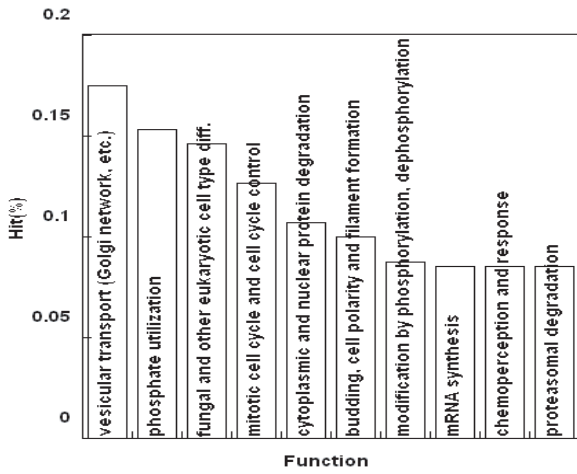

(a)

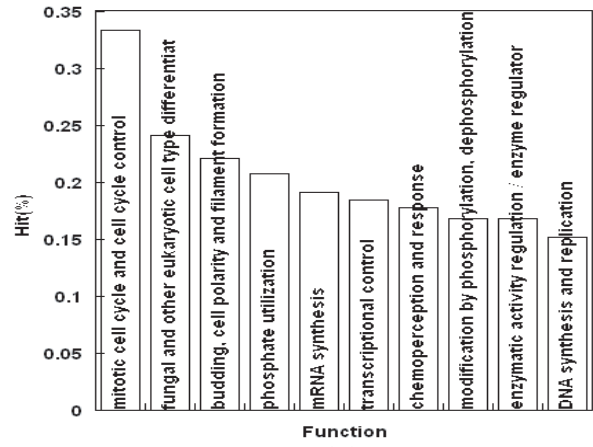

(b)

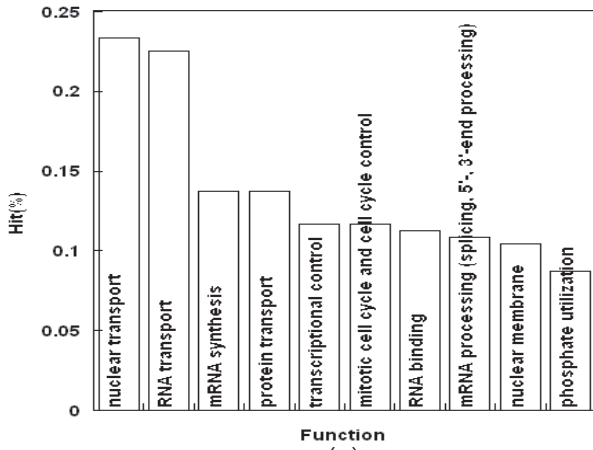

(c)

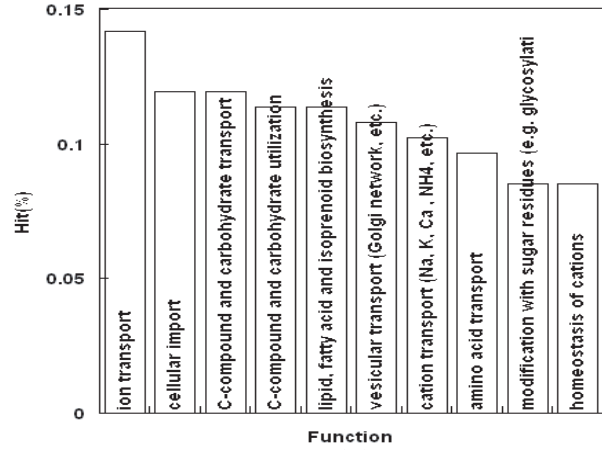

(d)

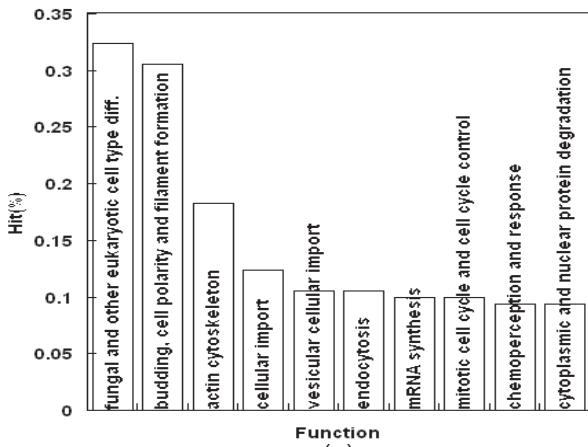

(e)

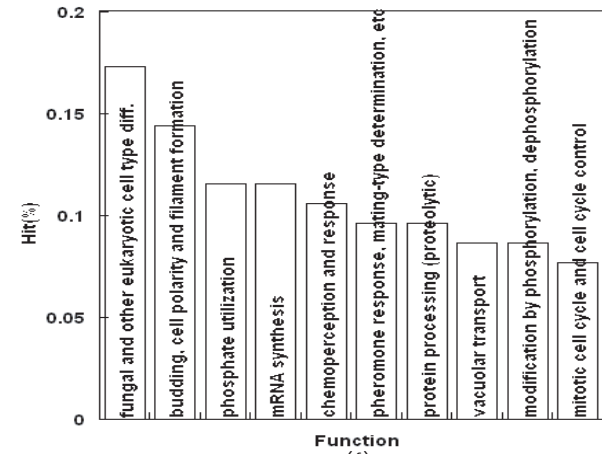

(f)

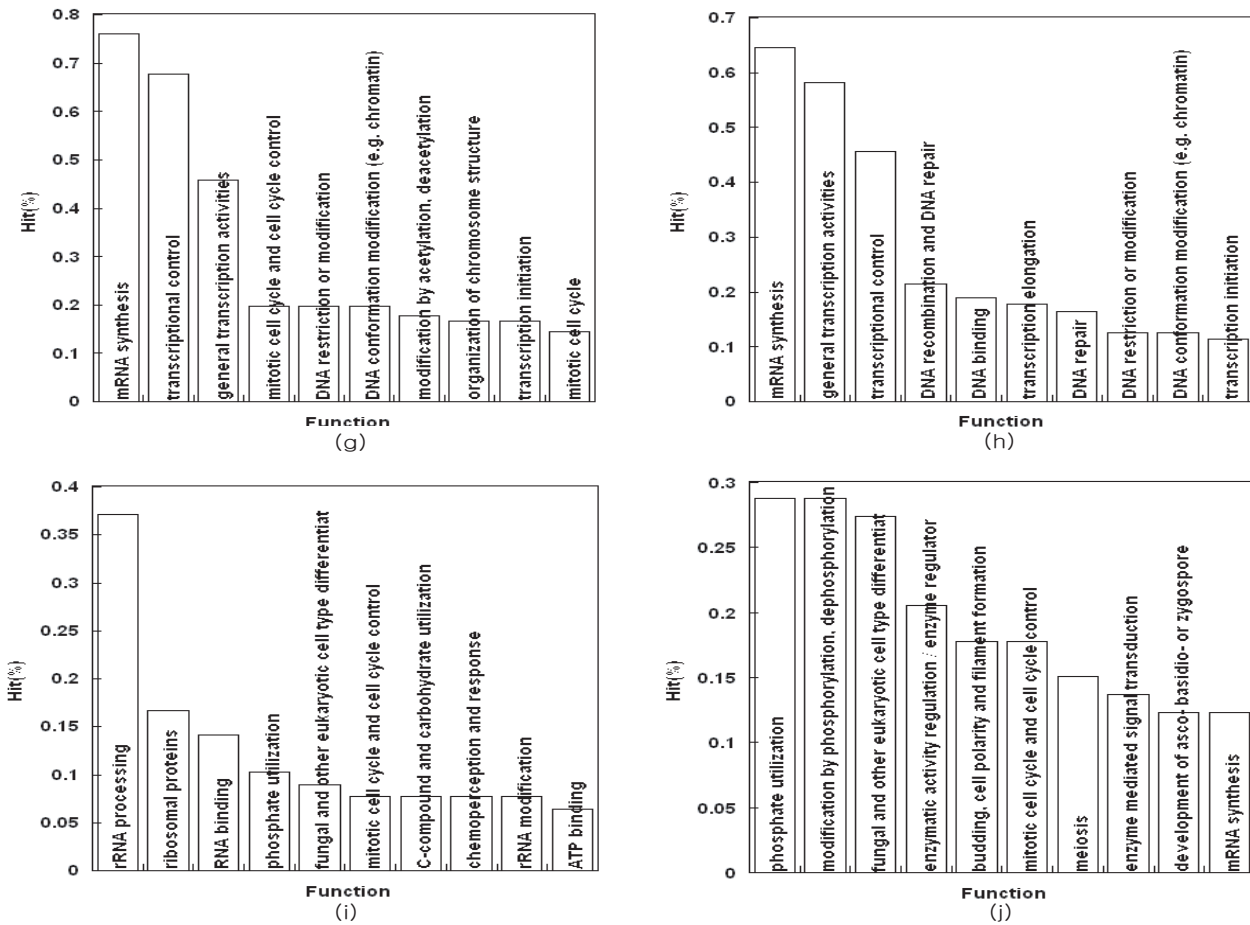

Fig. 1: Functional term distribution in MIPS functional category for the 10 largest clusters detected by CASCADE (Additional file 1). (a) cluster 1, size 411. (b) cluster 2, size 303. (c) cluster 3, size 240. (d) cluster 4, size 176. (e) cluster 5, size 170. (f) cluster 6, size 104. (g) cluster 7, size 96. (h) cluster 8, size 79. (i) cluster 9, size 78. (j) cluster 10, size 73. Each histogram shows the percentile of proteins that are annotated by the top ten best assigned functional terms for each cluster.
