# Supplementary material for: CASCADE: a novel quasi all paths-based network analysis algorithm for clustering biological interactions
Source: PubMed Central journal article supplement (PMC2253513; doi:10.1186/1471-2105-9-64), 2008-01-29
Supplement: 1471-2105-9-64-S4.pdf [file 1471-2105-9-64-S4.pdf]

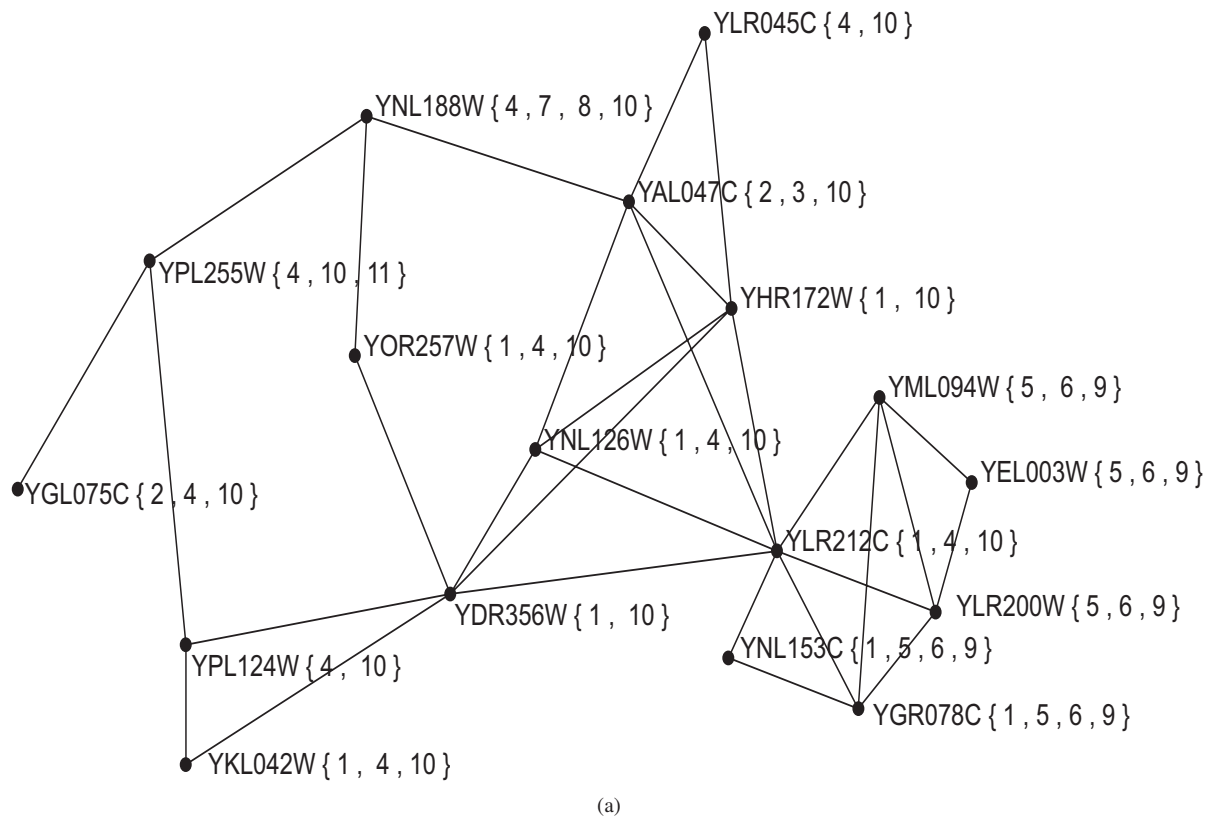

(a)

| Function ID | MIPS ID         | Function name                                                        |
|-------------|-----------------|----------------------------------------------------------------------|
| 1           | 10.03.01        | mitotic cell cycle and cell cycle control                            |
| 2           | 10.03.01.01.11  | mitosis                                                              |
| 3           | 10.03.04.09     | nuclear migration                                                    |
| 4           | 10.03.05.01     | spindle pole body/centrosome and microtubule cycle                   |
| 5           | 14.01           | protein folding and stabilization                                    |
| 6           | 16.01           | protein binding                                                      |
| 7           | 34.11.03.07     | pheromone response, mating-type determination, sex-specific proteins |
| 8           | 41.01.01        | mating (fertilization)                                               |
| 9           | 42.04           | cytoskeleton                                                         |
| <b>10</b>   | <b>42.04.05</b> | <b>microtubule cytoskeleton</b>                                      |
| 11          | 43.01.03.05     | budding, cell polarity and filament formation                        |

(b)

Fig. 2: Topological shape and functional annotations of Cluster 20 in Additional file 1. (a) sub graph of Cluster 20 extracted from DIP PPI network. Each protein is annotated by MIPS functional category. (b) MIPS functional IDs and their corresponding literal names. The best assigned functional term is boldfaced.
