# Supplementary material for: CASCADE: a novel quasi all paths-based network analysis algorithm for clustering biological interactions
Source: PubMed Central journal article supplement (PMC2253513; doi:10.1186/1471-2105-9-64), 2008-01-29
Supplement: 1471-2105-9-64-S7.pdf [file 1471-2105-9-64-S7.pdf]

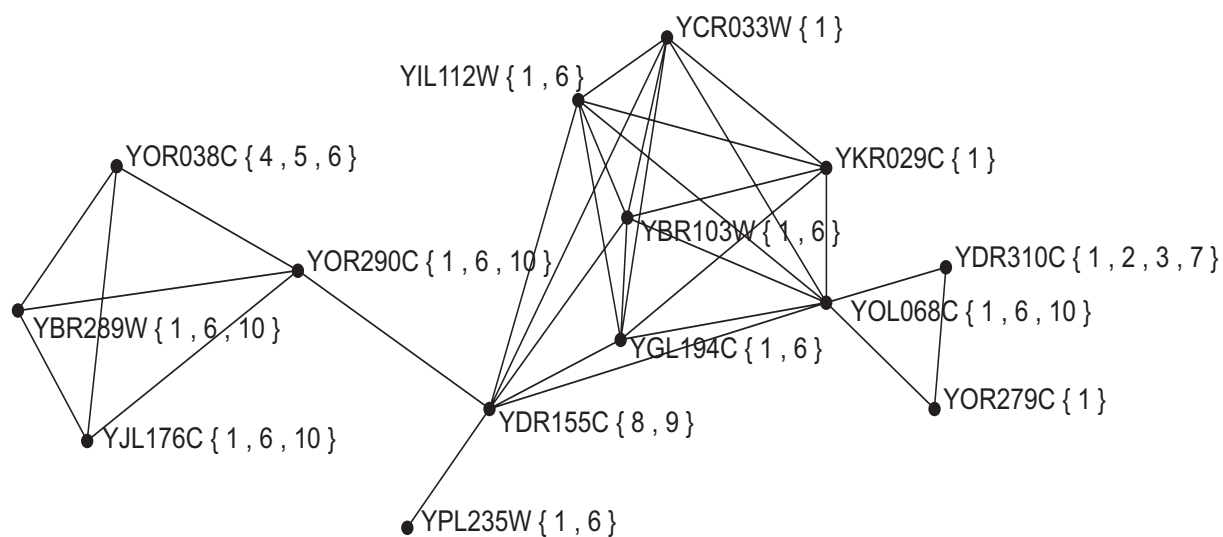

(a)

| Function ID | MIPS ID            | Function name                                                                                      |
|-------------|--------------------|----------------------------------------------------------------------------------------------------|
| <b>1</b>    | <b>10.01.09.05</b> | <b>DNA conformation modification (e.g. chromatin)</b>                                              |
| 2           | 10.03.01.01        | mitotic cell cycle                                                                                 |
| 3           | 10.03.01.03        | cell cycle checkpoints (checkpoints of morphogenesis, DNA-damage,-rep., mitotic phase and spindle) |
| 4           | 10.03.04.01        | centromere/kinetochore complex maturation                                                          |
| 5           | 11.02.03.01        | general transcription activities                                                                   |
| 6           | 11.02.03.04        | transcriptional control                                                                            |
| 7           | 11.02.03.04.03     | transcriptional repressor                                                                          |
| 8           | 14.01              | protein folding and stabilization                                                                  |
| 9           | 32.01              | stress response                                                                                    |
| 10          | 34.11.03.07        | pheromone response, mating-type determination, sex-specific proteins                               |

(b)

Fig. 5: Topological shape and functional annotations of Cluster 25 in Additional file 1. (a) sub graph of Cluster 25 extracted from DIP PPI network. Each protein is annotated by MIPS functional category. (b) MIPS functional IDs and their corresponding literal names. The best assigned functional term is boldfaced.
